# Supplementary material for: Integrating Single-Cell RNA-Seq and Bulk RNA-Seq to Explore the Key Role of Fatty Acid Metabolism in Breast Cancer
Source: Preprints.org preprint supplement (doi:10.20944/preprints202306.1035.v1), 2023-06-14
Supplement: Supplementary file 3 [file Table 1.docx]

| **Oligonucleotides** | **Nucleotide sequence (5'-3')** |
| --- | --- |
| **siRNA** |  |
| SiRNA-NC | UUCUCCGAACGUGUCACGUTT |
| Si-NDUFAB1 | GACCUGGGCUUAGACAGUUTT |
|  |  |
| **Primer** |  |
| β-acting | CCTGGCACCCAGCACAAT (forward) |
|  | GGGCCGGACTCGTCATACT (reverse) |
| NDUFAB1 | ATGGCGTCTCGTGTCCTTTC(forward) |
|  | AACCTGCGCGAGCACTAAG (reverse) |
|  |  |

**Table S1. Oligonucleotides used in research**
